# Supplementary material for: Effect of Geometrical Confinement on Ordering of Thermoplastic Polyurethanes with Crystallizable Hard and Soft Blocks
Source: MDPI journal article supplement (doi:10.3390/cryst13121662), 2023-12-05
Supplement: s1 [file s1]

**Table S1.** Stoichiometry of the designed TPUs

|               | PBA diols (mmol) | HMDI <sup>a</sup> (mmol) | HMDI <sup>b</sup> (mmol) | MDI <sup>b</sup> (mmol) | BD <sup>b</sup> (mmol) | HS, % |
|---------------|------------------|--------------------------|--------------------------|-------------------------|------------------------|-------|
| TPU(PBA)      | 6                | 0                        | 0                        | 12                      | 6                      | 35    |
| TPU(PBA-MDI)  | 6                | 0                        | 3                        | 9                       | 6                      | 35    |
| TPU(PBA-HMDI) | 6                | 3                        | 0                        | 9                       | 6                      | 35    |

<sup>a</sup>HMDI is used to prepare macrodiols.<sup>b</sup>HMDI is used to prepare hard block.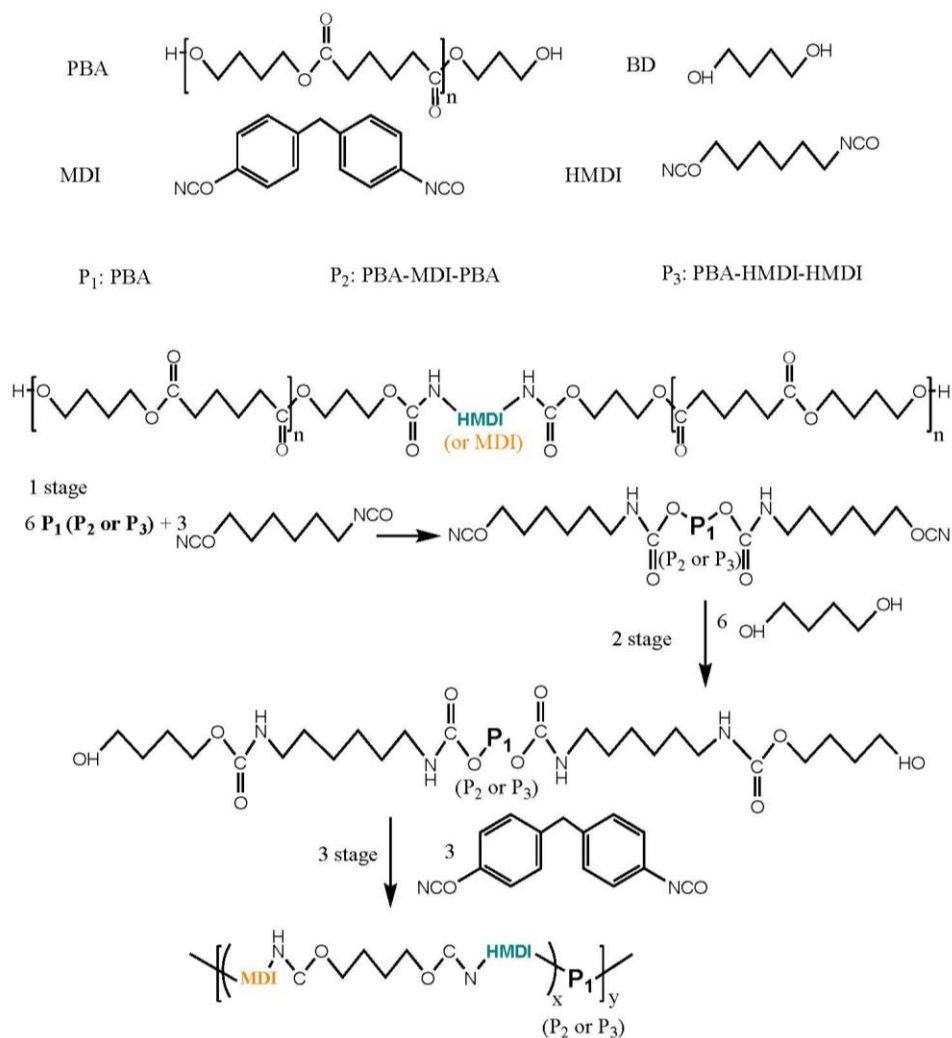**Scheme S1.** The reaction scheme of the designed TPUs.

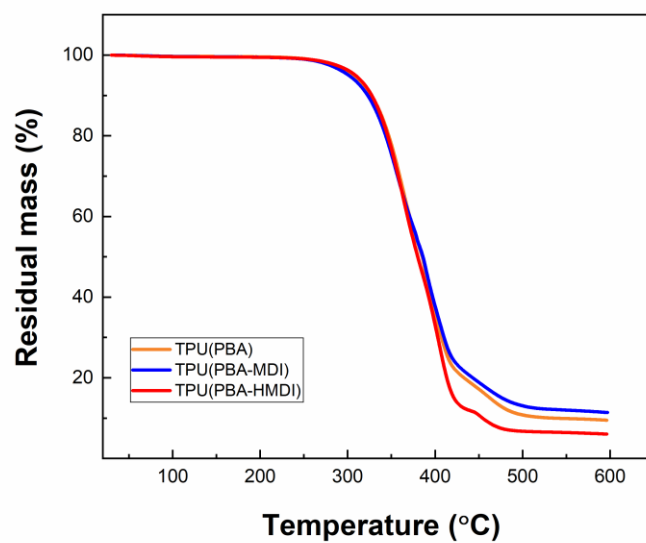

**Figure S1.** TGA curves for the TPU samples measured at a rate of 10 °C/min in nitrogen atmosphere.

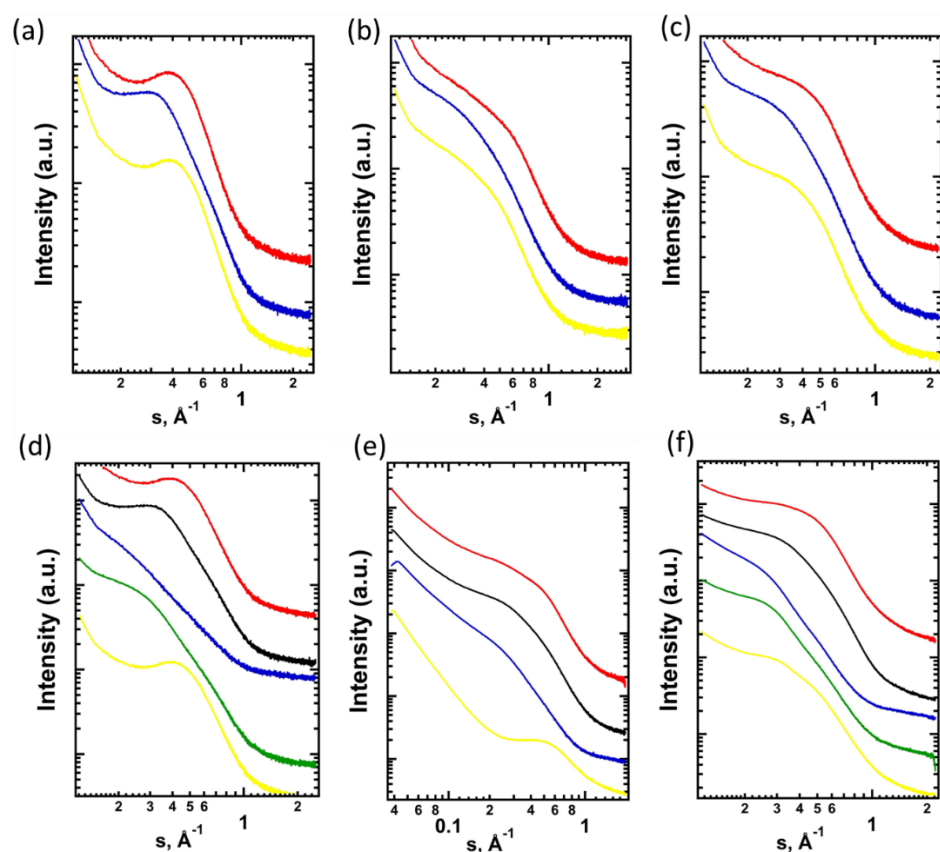

**Figure S2.** SAXS curves of TPU(PBA-HMDI) (a, d), TPU(PBA) (b, e), TPU(PBA-MDI) (c,f): initial (red), after SS melting (black), at maximum temperature (blue), immediately after cooling (green) and after isothermal crystallization (yellow):  $T_m = 80\text{ °C}$  (a,b,c) and  $T_m = 180\text{ °C}$  (d,e,f).

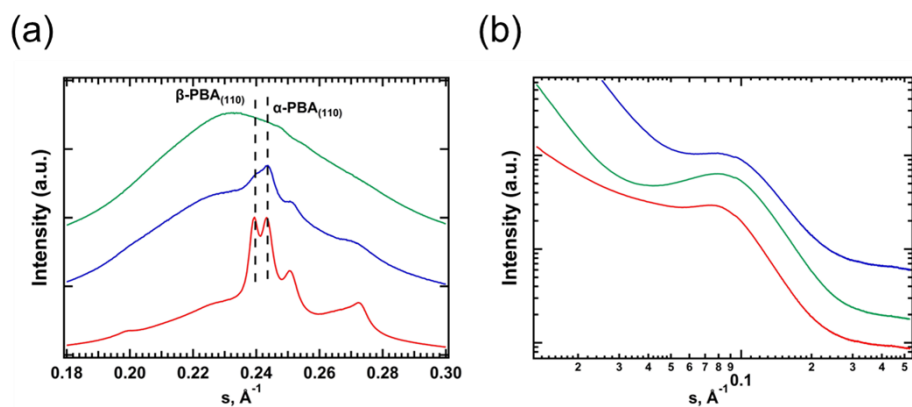

**Figure S3.** WAXS (a) and SAXS (b) curves for TPUs after cooling from 230°C and crystallization for 1 week at RT: TPU(PBA) (green), TPU(PBA-MDI) (blue), TPU(PBA-HMDI) (red).

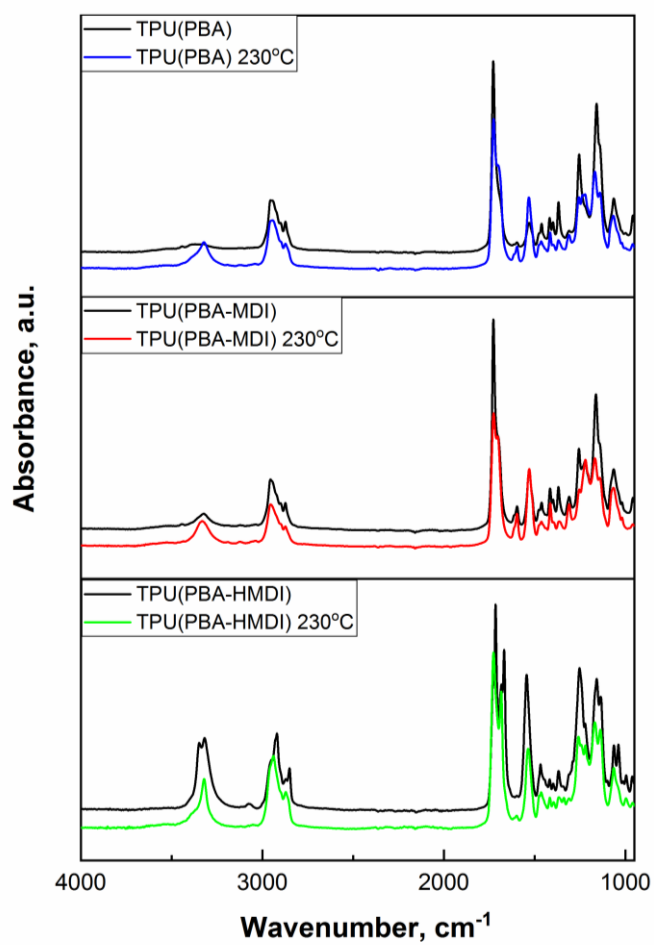

**Figure S4.** IR spectra for the native samples (black curve) and samples crystallized after heating to 230 °C (color curves).

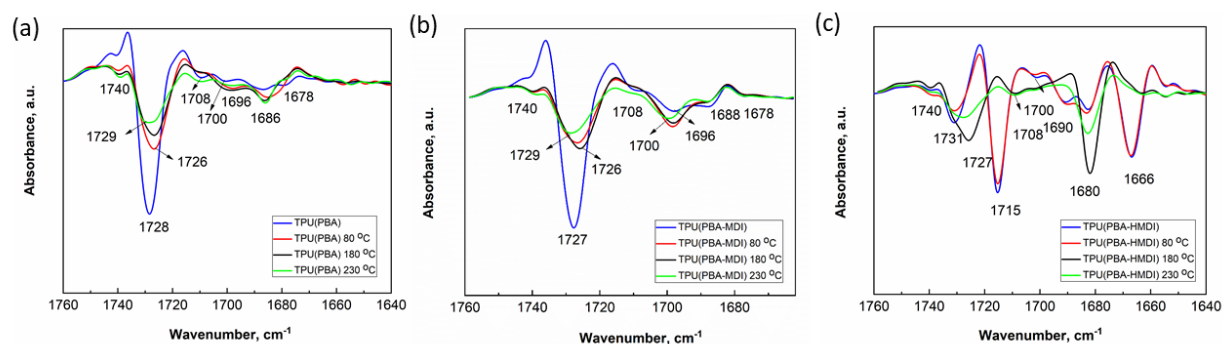

**Figure S5.** The second derivatives IR spectra TPU(PBA) (a), TPU(PBA-MDI) (b) and TPU(PBA-HMDI) (c) native samples (blue lines) and crystallized after 80°C (red lines), 180°C (black lines) and 230 °C (green lines).
