# Supplementary material for: Effect of Geometrical Confinement on Ordering of Thermoplastic Polyurethanes with Crystallizable Hard and Soft Blocks
Source: MDPI journal article supplement (doi:10.3390/cryst13121662), 2023-12-05
Supplement: s1 [file s1]

Archive with 1 entries (1 files):
- crystals-2754468-supplementary.pdf
